# Supplementary material
Source: publisher site journal article supplement (https://www.dovepress.com/article/397127)
Supplement: Supplementary file 1 [file get_supplementary_file.php]

**Appendix 1: Review of T1DM and DKA symptomatology, Sub-Saharan African series**

| **Signs/Study** | **Number of cases** | **% DKA** | **% Polydipsia** | **% Polyuria** | **% Loss of weight** | **% Abdominal pain** | **% Nausea/**  **Vomiting** | **% Respiratory symptoms** | **% Altered**  **state of consciousness** | **% Asthenia** | **% Fever** | **% Dehydration** |
| --- | --- | --- | --- | --- | --- | --- | --- | --- | --- | --- | --- | --- |
| Onyiruika et al., 2014, Nigeria20 | 48 | 70 | 70 | 90 | 50 | 50 | 30 | 90 |  | 70 | 10 | 100 |
| Iddi et al., 2017, Tanzania11 | 30 | 100 | 90 | 40 | 6.9 | 13 | 6-20 | 10 | 37 | 41 |  |  |
| Ibekwe et al, 2011, Nigeria22 | 16 | 88 | 81 | 93 | 68 | 0.2 | 18 | 30 | 40 | 50 | 12 | 100 |
| Atkilt et al, 2017, Ethiopia18 | 395 | 100 | 11.9 | |  | 20 | 31 |  |  |  | 7 |  |
| Ameyaw et al, 2015, Ghana10 | 100 | 60 | 98 | 100 | 82 |  |  |  |  |  |  |  |
| Mbugua et al, 2005, Kenya48 | 48 | 100 |  |  |  |  |  |  | 90 |  |  | 75 |

**Appendix 2, Vignettes A, B and C**

| **Medical record** | **Vignette A**  **DKA precipitated by infection and elevated temperature** | **Vignette B**  **Abdominal pain/acute abdomen** | **Vignette C**  **DKA with onset of hypovolemic shock, altered state of consciousness** |
| --- | --- | --- | --- |
| **Age and gender** | 8 years old, girl | 13 years old, boy | 4.5 years old, boy  = 54 months |
| **Reason for consultation** | Decreased general condition with "weird" breathing | Abdominal pain | Altered state of consciousness |
| **General condition**  **"First look before evaluation** | Respiratory work seems to be increased | Poor general condition | Extremely poor general condition |
| **Constants**  Current weight  Last known weight  Size  Heart rate  Respiratory rate,  Saturation in 02  Temperature  Capillary refill time  Appearance of the palms and conjunctiva  Mid upper arm circumference | 25kg  28kg 3 months ago  123 cm  150/min  50 cycles/min  97% at ambient air  36.6o  3s  No palmoplantar pallor  Normal colored anicteric conjunctive  N/A | 45kg  52kg 3 months ago  165 cm  90 /min  30 cycles/min  98% at ambient air  36.7 o  2s  No palmoplantar pallor  Normal colored anicteric conjunctive  N/A | 14.4 kg  16kg 1 month ago  105 cm  150 bpm  55 cycles/min  98% at ambient air  36.5o  >3s  No palmoplantar pallor  Normal colored anicteric conjunctive  16 cm |
| **Nutritional status** | No signs of acute malnutrition  No edema | No signs of acute malnutrition, thinness  No edema | No signs of acute malnutrition |
| **State of hydration** | 5% dehydration  Irritable and tired child  Ask for a drink.  Dry mucosa  Reduction of tears  Prolonged skin folds | Dehydration <5%, dry mucosa  Moderate skin folds  Fit to drink | >10% dehydration  Unfit to drink  Signs of severe dehydration: dry mucous membranes, sunken eyes Absence of tears  Very prolonged skin folds  Retained diuresis. |
| **Medical history**  **Vaccination** | Single episode of malaria at 5 years of age, no other history  Up-to-date vaccinations according to local plan | No previous history  Up-to-date vaccinations according to local plan | No previous history  Up to date vaccines according to local plan |
| **Family history/ Contact (other sick children in the family)** | Notion of diabetes in a 55-year-old grandmother.  Notion of upper respiratory tract infection in a child in the family 3 weeks ago | No pathologies in the parents,  No notion of contagion | No notion of contagion |
| **Symptoms and duration** | Fatigue, polydipsia for 3 weeks  10 days: Febrile state with dysphagia, cervical adenopathy, and tonsillar swelling.  The mother consults the local health center. Diagnosis of upper respiratory tract infection, a treatment of antibiotics is administered and followed.  In the last 3 days, general condition decreased, fatigue, irritability with rapid breathing, increased polydipsia.  2 episodes of food vomiting yesterday | For 3 months, progressive appearance of polyuria/polydipsia and fatigue.  For 2 days, severe diffuse abdominal pain, nausea, with 5 episodes of food vomiting.  No diarrhea, no constipation | Polyuria/polydipsia with marked appetite  Nocturnal enuresis for 2 weeks  Altered state of consciousness for 2 days |
| **Cardiovascular status** | Thorax of normal morphology,  B1B2 well heard with no added noise.  Apex beat in 3-4 intercostal space.  Palpable but weak peripheral pulse, warm extremities | Thorax of normal morphology  B1B2 well heard with no added noise.  Apex beat in 4 intercostal spaces  Palpable peripheral pulse | Early shock with cold extremities, weak and rapid pulse.  Thorax of normal morphology, B1B2 with no additional noises |
| **Respiratory status** | Tachypneic at 50 cycles/min  No additional breath sounds.  Slight subcostal pull  Symmetrical thorax  Ample and symmetrical breathing  Normal breath sounds  Fruity breath | Slight tachypnea at 30/min  No additional breath sounds.  No signs of respiratory distress  Symmetrical, deep amplification  Normal breath sounds  Fruity breath | Tachypneic at 55/min,  Thorax of normal morphology  Signs of severe respiratory distress: chest indrawing, nasal flaring,  Moaning  Deep symmetrical amplification  Normal breath sounds  Fruity breath |
| **Abdominal status** | No abdominal complaints No vomiting  No scars  Normal gastric sounds  Abdomen soft, depressible, and painless.  Absence of hepatosplenomegaly | Strong abdominal pain, peri- umbilical, poorly characterized.  Normal gastric sounds  Soft, depressible, and diffusely sensitive abdomen  No guarding or rebound tenderness.  Absence of hepatosplenomegaly  Rectal examination without any particularities | No abdominal complaints No vomiting  No scars  Decreased gastric sounds in frequency, normal tone.  Soft, depressible, and painless abdomen  Absence of hepatosplenomegaly |
| **Neurological status** | Normal development, no problems at school  Irritability  Pupils equal and reactive  Tone, motor skills and sensitivity: normal  No neck stiffness.  Kernig/Brudzinski negative | Normal development, currently at the end of high school  Pupils equal and reactive  Tone, motor skills, sensitivity: normal  No neck stiffness  Kernig/Brudzinski negative  Neurological status otherwise normal | Normal development  Lethargic  Pupils equal and reactive  Decreased tone.  No neck stiffness. Kernig/Brudzinski negative |
| **Glasgow Coma Scale** | Ocular: 4  Verbal: 5  Motor: 6  15 | Ocular :4  Verbal: 5  Motor: 6  15 | Ocular: 3  Verbal: Inappropriate 3  Motor: Location 5  11 |
| **Skin condition** | Absence of skin lesions | Absence of skin lesions | Absence of skin lesions |
| **Urogenital system** | Normal | Male genitalia within the age range  No testicular pain | Normal |
| **Blood count**  Hemoglobin  Hematocrit  MCV  MCHC  Total leukocytes  Distribution: PNN/PNE/PNB  Monocytes  Lymphocytes  **Malaria POC/Thick film** | Moderate DKA  120 g/L  38%  80fl  340fl  18x109/L  80% / 3%/ 2%  2%  13%  Negative | Moderate DKA  130 g/l  37%  80fl  340fl  4 x109/L  80% / 2%/1%  1%  16%  Negative | Not available in CSPS  (Excepted rapid diagnostic test) |
|  |  |  | Negative |
| **Blood gases**  Venous Ph  PO2  PCO2  Bicarbonate  Anion Gap | 7.15  38 mmHg  50 mmHg  8 mmol/l  30 mmol/l | 7.2  40 mmHg  48 mmHg  13 mmol/l  19 mmol/l | Not available in CSPS |
| **Biochemistry**  Blood glucose  Total Protein  Na  K+  Cl  Creatinine  Urea  Calcium  Magnesium  Phosphate | **18 mmol/l**  90 gr/l  148 mmEq/l  5 mmol/l  110 mmol/l  130 umol/l  9 mmol/l  2.3 mmol/l  0.8 mmol/l  0.3 mmol/l | **20mmol/l**  92 gr/l  140 mmEq/l  5.6 mmol/l  108 mmol/l  120 umol/l  10 mmol/l  2.5 mmol/l  0.7 mmol/l  0.4 mmol/l | Not available in CSPS |
| **Urine analysis**  Ketonuria (dipstick)  Urinary sediment  Urine strip | ++  Negative  **Glu++++** | ++  Negative  **Glu ++++** | Not available in CSPS |
| Emergency triage assessment and treatment “*ETAT*” **(WHO pediatric emergency triage algorithm for healthcare worker)** | **Not applicable** | |  |
| **Airway: Obstruction/Central cyanosis/Severe respiratory depression** |  | | None |
| **Circulation: Cold hands + capillary refill time >3 + weak and rapid pulse** |  | | Present |
| **AVPU Scale**  **Seizure** |  | | Between V-P  Absence of seizure |
| **Severe dehydration if child has diarrhea (According to *ETAT* system)** |  | | Severe dehydration without diarrhea |
| **Signs of priority applicable in context: Respiratory distress, agitation, continued irritability, or lethargy,** |  | | Respiratory disress  Lethargy |
| ***ETAT* instruction according to emergency/priority signs** |  | | Safety lateral position  Glucose 5% infusion  Transfer at the earliest possibility |

**Appendix 3: Summary of history/physical examination and differential diagnosis vignette A**

(In orange in the rest of the document: Elements not necessarily noticed/transmitted/requested during the consultation, and therefore not considered in the differential diagnosis)

**Anamnesis and Status: Summary**

- **Context** Emergency consultation in a medical center with a general practitioner
- **Reason for consultation** Respiratory distress and decreased general condition in an 8-year-old girl.
- **History**

Episode of upper respiratory tract infection with antibiotic treatment at the community health center 10 days ago. Currently, general condition is poor, with rapid breathing and two episodes of vomiting yesterday. Food and hydration are maintained.

*Polydipsia for 3 weeks, aggravated for 2 days. Loss of 3kg in 3 months.*

- **Status**

Tachypnea 50 cycles/min. Afebrile. Deep breathing with no added sounds. -

Slight dehydration. *Fruity breath.*

Normal neurological status, irritable child.

Vitals: HR 150/min, FR 30/min, T° 36.6°C

**Urgent care needed?** 20

- **Emergency signs present:** tachypnea at 50 with mild chest indrawing.

Clear airways and give oxygen (if accessible in the context)

- **Priority signs present:** respiratory distress/breathing difficulty visible on assessment.

**Priority care**

**Differential diagnosis**

| **Main diagnostic hypotheses** | **Examination of first intention** |
| --- | --- |
| Severe malaria  Bacterial pneumonia  Viral pneumonia  Meningitis  Sepsis  Anemia of unknown  origin | CBC, electrolytes  Hemoglobin alone  Blood gases  Malaria POC/Thick film  Chest X-ray  Lumbar puncture |

**Diagnostic hypotheses, vignette A28,29**

| **System** | **Pathology** | **Symptoms** | **Pediatric prevalence in Burkina Faso**23 | **Clinical probability** | **Additional examinations if available** |
| --- | --- | --- | --- | --- | --- |
| **Pulmonary** | Bronchitis or pneumonia of bacterial origin | + Tachypnea  + recent ENT infection  - Normal breath sound  **- Ø** Fever  **- Ø** Cough | High | High30,31 | - Chest X-ray  - CBC  - Oxygen saturation |
| Asthma attack or viral bronchopneumonia | + Tachypnea  - Normal breath sound  **- Ø** Added noise  - Subacute onset | Low  (Probable under diagnosis) | High | - Trial test |
| Tuberculosis | + Tachypnea  + Weight loss  + Fatigue  + Cervical adenopathy  **- Ø** Cough  **- Ø** Fever  **- Ø** Illness in a relative | Moderate | Moderate | - Chest X-ray  - GeneXpert |
| Pneumothorax | + Tachypnea  - Normal breath sound  **- Ø** Pain  **- Ø** Trauma | Rare | Low | - Chest X-ray |
| **Neurologica**l | Meningitis32-36 | + Vomiting  + Recent ENT infection  + Irritability  **- Ø** Fever  - Normal neurological status  **- Ø** Meningitis  **- Ø** Skin rash | High | High | - Lumbar puncture |
| **Cardiac** | Heart failure | + Tachypnea  + Fatigue  + Weight loss  - Normal cardiopulmonary status  **- Ø** Cardiac history | Moderate | Low | - Chest X-ray  - Cardiac ultrasound |
| **Infection** | Malaria36-38 | + Tachypnea  + Deep breathing  + Fatigue  + Vomiting  + Irritability  - Last feverish episode 10 days before  **- Ø** Hepatosplenomegaly | High | High  With signs of severe malaria (tachypnea) | - CBC  - Malaria POC/Thick film |
| Sepsis of unknown origin | + Tachypnea  + Tachycardia  + Fatigue  **- Ø** Clinical focus  **- Ø** Fever | Unknown | Moderate | - CBC  - Chest X-ray  - Urinary dipstick  - Blood cultures |
| Dengue | + Tachypnea  + Fatigue  - Normal breath sound  **- Ø** Fever | Spike in cases in Burkina Faso since 2017 41-42 | Moderate | - CBC allows to eliminate the hypothesis |
| Gastroenteritis | + Mild dehydration  + Vomiting (2 episodes)  **- Ø** Diarrhea  - Normal abdominal status | High | Low | Ø |
| Typhoid fever | + Tachypnea  + Vomiting  + Fatigue  **- Ø** Fever  **- Ø** Cough  **- Ø** Constipation  **- Ø** Rash  **- Ø** Tachycardia | High | Low60 | Ø |
| HIV | + Weight loss  + Fatigue  + Ev. HIV-associated  pneumonia  (Pneumocystis jirovecii)  - Adenopathy in connection with ENT infection  **- Ø** Recurrent infections | High | Low | - CBC  - Chest X-ray  - HIV rapid test |
| **Metabolic** | Diabetic ketoacidosis | + Tachypnea  + Deep breathing  (Kussmaul)  + Vomiting,  + Slight dehydration  + Fatigue  + Weight loss  + Recent ENT infection  + Age  + Polydipsia  + Fruity breath  - Ø Polyuria | Low: 10 cases reported in 2016 among 5–14-year-olds, tot. population of this age is around 5 million in Burkina Faso  Actual prevalence unknown 1 | Low/Medium  High | - CBC/Electrolytes  - Blood glucose  - Urinary Stix  - Hb1Ac |
| **Metabolic** | Anemia of unknown origin | + Tachypnea  + Tachycardia  + Fatigue  + Weight loss  **- Ø** Bleeding  **- Ø** Icterus  **- Ø** Palmoplantar/conjunctival pallor  **- Ø** Recent malaria episode  **- Ø** Thalassemia/sickle cell disease | High | High | - Hb alone  - CBC  - Ferritin |
| **Oncology** | Neoplasia  Ex: neuroblastoma | + Weight loss  + Fatigue  + Sub-acute onset  + Tachycardia/Tachypnea  **- Ø** Fever  **- Ø** Night sweating | Low | Low | - CT |

# **Appendix 4: Summary of history/physical examination and differential diagnosis vignette B**

In orange in the text, the anamnestic elements identifying the DM if stated spontaneously by the patient/parents or specifically sought by the physician.

**Anamnesis and Status: Summary**

- **Context** Emergency consultation in a medical center with a general practitioner during the dry season (high heat)
- **Reason for consultation** Abdominal pain for 2 days with nausea and vomiting in a 13-year-old boy.
- **History**

13-year-old boy, in good health, with no medical or surgical history, up-to-date vaccination according to the national plan, presenting to the consultation for diffuse abdominal pain for 2 days, associated with nausea and food vomiting (5x).

Normal transit and feeding/hydration maintained. First episode of this type

No recent antibiotic treatment

Loss of 7kg in the last 3 months with fatigue, polyuria, and polydipsia in aggravation

- **Status**

General condition preserved, without signs of malnutrition. Mild dehydration. No palmoplantar pallor, anicteric colored conjunctiva. Abdominal status normal except for diffuse tenderness. Painless testicles. Normal breath sounds

Fruity breath

Vitals: HR 90/min, FR 30/min, T° 36.7 °C

**Differential diagnosis**

| **Main diagnostic hypotheses** | **Examination of 1ère intention** |
| --- | --- |
| Viral or bacterial gastroenteritis  Appendicitis  Typhoid fever  Sickle cell anemia  Anxiety | CBC, electrolytes  Abdominal echography  Abdominal X-ray  Urine dipstick |

**Diagnostic** hypotheses

| **System** | **Pathology** | **Symptoms** | **Pediatric prevalence in Burkina Faso**23 | **Clinical probability** | **Review. Additional examination required** |
| --- | --- | --- | --- | --- | --- |
| **Digestive** | Appendicitis43,44 | + Periumbilical abdominal pain on palpation  **+** N/V  + Age (prevalence 12- 17%)  **- Ø** Fever **LR-** 0.32  **- Ø** Peritonism  **- Ø** Trigger **LR-** 0.28  Modified Alvarado score (Leucocyte 4G/l) = 1à unlikely | Moderate | Moderate | - CBC  - Abdominal echography |
| Constipation | + Diffuse pain  - Negative anamnesis  **- Ø** Abdominal mass | **Ø** | Low | **Ø** |
| Mesenteric adenitis | + Diffuse abdominal pain on history  **- Ø** Fever  **- Ø** Adenopathy | **Ø** | Diagnosis of exclusion | **Ø** |
| Ileus of unknown origin | + Abdominal pain  **+** N/V  - Retained transit  - Normal abdominal sounds | **Ø** | Low | Abdominal X-Ray |
| Viral/bacterial gastroenteritis | + General condition maintained.  + Poorly characterized abdominal pain.  **+ Ø** Peritonism  **+** N/V  + Mild dehydration  **- Ø** Diarrhea  **- Ø** Fever  **- Ø** Illness in family | High | High | - Stool culture if  bacterial suspicion |
| Hepatic abscess (amoebae...) | **+** Weight loss  **+** Fatigue  **- Ø** Hepatomegaly  **- Ø** Fever  **- Ø** Pain in right hypochondrium | Moderate | Low | - CBC  - Abdominal echography |
| Hepatitis of unknown origin | **+** N/V  + Abdominal pain  **- Ø** Right hypochondrium pain  **- Ø** Icterus  - Up-to-date vaccination (viral hepatitis) | Low | Low | - CBC  - Abdominal echography |
| **Genitourinary** | Urinary tract infection/  Pyelonephritis | **- Ø** Urinary symptoms  **- Ø** Fever  - Flexible and painless renal lodges | High | Average | - Stix  - ECBU |
| Testicular torsion/  Epididymitis | **- Ø** Testicular pain  - Normal genital examination | Low | Low | - Testicular echography |
| **Pulmonary** | Bacterial pneumonia | - Periumbilical pain  **- Ø** Fever  **- Ø** Cough  - Normal pulmonary auscultation | High | Low | - Radiography  thoracic |
| **Toxic** | Lead poisoning | + Diffuse abdominal pain in colic  **+** N/V  - Negative ingestion history  - Normal neurological status  - Age | **Ø** | Low | - Specialized analysis |
| **Infection** | Typhoid fever/  Paratyphoid | **+** N/V  + Diffuse abdominal pain  **- Ø** Fever  **- Ø** Illness in family | High |  | - CBC  - Blood culture |
| **Functional** | Anxiety | **+** Age  + Pain not well characterized.  + Typical localization of somatic pain  **+ Ø** Signs of severity | **Ø** | Moderate | **Ø** |
| **Hematology** | Sickle cell anemia | **+** Season  + Ethnicity  + Abdominal pain  - History of painful crisis  **- Ø** Sickle cell stigmata | High | Moderate/  Low | - Blood test |
| **Endocrinology** | Diabetic ketoacidosis | **+** Fatigue  + Polydipsia/Polyuria  **+** Weight loss  **+** Normal abdominal exam  **+** Fruity breath  + Diffuse abdominal pain  **+** Season | Low  10 cases reported in 2016 among 5–14-year-olds.  Actual prevalence unknown | High if orange elements are considered | - CBC  - Blood glucose  - Urinary Stix |
